# Supplementary material
Source: MDPI journal article supplement (https://www.mdpi.com/1424-2818/9/2/20)
Supplement: s1 [file s1]

# The Phylogeny and Biogeography of *Phyla nodiflora* (Verbenaceae) Reveals Native and Invasive Lineages throughout the World

Caroline L. Gross <sup>1,\*</sup>, Mohammad Fatemi <sup>1,2</sup>, Mic Julien <sup>3,4</sup>, Hannah McPherson <sup>5</sup> and Rieks Van Klinken <sup>3</sup>

<sup>1</sup> Ecosystem Management, University of New England, Armidale 2351, NSW, Australia

<sup>2</sup> Current address: Biology, Golestan University, Beheshti St., Gorgan, Iran; fatemi980@yahoo.com

<sup>3</sup> Ecosystem Sciences, CSIRO, EcoSciences Precinct, Dutton Park 4102, QLD, Australia; rieks.vanklinken@csiro.au

<sup>4</sup> Current address; 64 Tyalgum Creek Rd, Tyalgum 2484, NSW, Australia; mic.julien@hotmail.com

<sup>5</sup> National Herbarium of New South Wales, Royal Botanic Gardens and Domain Trust, Mrs Macquaries Road, Sydney 2000, NSW, Australia; hannah.mcpherson@rbgsyd.nsw.gov.au

\* Correspondence: cgross@une.edu.au; Tel.: +61-2-6773-3759

**Table S1.** Specimens sequenced for nr-DNA and the phylogeography of *Phyla nodiflora*, with voucher information and GenBank accession numbers. Herbarium acronyms stand for: AD = State Herbarium of South Australia; BISH = Herbarium Pacificum; BRI = Queensland Herbarium; CANB = Australian National Herbarium; DNA = Northern Territory Herbarium; FLAS = Florida Museum of Natural History; Gorgan = University of Gorgan; K = Royal Botanic Gardens Kew; MEL = National Herbarium of Victoria; MO = Missouri Botanical Garden Herbarium; MPU = Université Montpellier II; NE = N. C. W. Beadle Herbarium; NSW = Royal Botanic Gardens, Sydney; PERTH = Western Australian Herbarium; PRE = South African National Biodiversity Institute; SI = Museo Botánico; UC = University of California; US = Smithsonian Institution; XAL = Instituto de Ecología, A.C. s.n. = without number.

| Ribotype | Voucher                           | Lat    | Long   | Provenance | State            | GenBank  |
|----------|-----------------------------------|--------|--------|------------|------------------|----------|
| 1        | Cope 120, K                       | 22.35  | 58.80  | Oman       | Wahiba           | HM194095 |
| 2        | Radcliffe-Smith 3708, K           | 20.33  | 57.65  | Oman       | Rumais           | HM194093 |
| 3        | Miller 2333, K                    | 17.23  | 54.52  | Oman       | Dhofar           | HM194094 |
| 3        | Madhu 22, NSW                     | 28.63  | 77.22  | India      | Delhi            | JQ014150 |
| 4        | Field 72, K                       | -7.58  | 72.42  | Chagos     | Ile du Coin      | HM194092 |
| 5        | Rowaished <i>et al.</i> , 2697, K | 13.03  | 44.87  | Yemen      | Lahij            | HM194103 |
| 6        | Spellenberg 7498, K               | 13.93  | 44.18  | Yemen      | Ibb              | HM194102 |
| 7        | Field 141, K                      | -7.58  | 72.42  | Chagos     | Diego Garcia     | HM194089 |
| 8        | Robertson 3075, K                 | -7.17  | 56.27  | Seychelles | Coetivy          | HM194096 |
| 9        | Kilian & Lobin 1807, K            | 2.60   | 45.50  | Somalia    | Middle Shabeelle | HM194097 |
| 10       | Kostermans 24891, K               | 8.95   | 79.90  | Sri Lanka  | Mannar           | HM194099 |
| 11       | Kuchar 17496, K                   | 3.22   | 45.52  | Somalia    | Jalalaqsi        | HM194098 |
| 12       | Bingham 10386, K                  | -15.77 | 27.92  | Zambia     | Southern         | HM194104 |
| 13       | Hamid 38544, K                    | 30.80  | 46.90  | Iraq       | Basrah           | HM194090 |
| 14       | Kalf <i>et al.</i> , 47368, K     | 33.38  | 43.57  | Iraq       | Anbar            | HM194091 |
| 15       | Frontier-Tanzania CFRP 1444, K    | -7.83  | 39.92  | Tanzania   | Coast            | HM194100 |
| 15       | Wingfield 4177, K                 | -6.85  | 39.27  | Tanzania   | Coast            | HM194101 |
| 16       | Salubeni & Kwatha 4812, K         | -15.37 | 35.32  | Malawi     | Zomba            | HM194087 |
| 17       | Phillipson 2262, K                | -18.83 | 44.45  | Madagascar | Mahajanga        | HM194085 |
| 17       | Salubesi 888, K                   | -15.37 | 35.32  | Malawi     | Dedza            | HM194088 |
| 18       | Leeuwenberg 137707, K             | -17.68 | 49.47  | Madagascar | Foulpointe       | HM194086 |
| 19       | PERTH 05392535                    | -32.28 | 115.72 | Australia  | WA               | HM194122 |
| 19       | PERTH 05553202                    | -31.92 | 115.83 | Australia  | WA               | HM194123 |
| 20       | Fatemi <i>et al.</i> , 86, Gorgan | 36.75  | 53.10  | Iran       | Mazandaran       | HM194077 |
| 20       | Fatemi <i>et al.</i> , 87, Gorgan | 36.75  | 53.10  | Iran       | Mazandaran       | HM194078 |
| 20       | van Klinken s.n., CANB            | -20.74 | 116.85 | Australia  | WA               | HM194105 |
| 20       | Thompson s.n., CANB               | -16.14 | 128.71 | Australia  | WA               | HM194106 |
| 20       | PERTH 06592996                    | -27.72 | 114.15 | Australia  | WA               | HM194120 |
| 20       | PERTH 04104498                    | -31.53 | 115.70 | Australia  | WA               | HM194125 |
| 20       | PERTH 07215290                    | -31.91 | 115.76 | Australia  | WA               | HM194126 |
| 20       | PERTH 02160137                    | -16.43 | 123.03 | Australia  | WA               | HM194129 |
| 21       | BRI533847                         | -31.75 | 115.75 | Australia  | WA               | HM194033 |

| Ribotype | Voucher                        | Lat    | Long    | Provenance         | State               | GenBank  |
|----------|--------------------------------|--------|---------|--------------------|---------------------|----------|
| 21       | Yupeng s.n.                    | 23.10  | 109.61  | China              | Gui-Gang City       | HM194071 |
| 21       | Gilbert 479-A, K               | 10.00  | 38.33   | Ethiopia           | Shoa                | HM194081 |
| 21       | Thornhill 269, PRE             | -29.37 | 24.89   | South Africa       | KwaZulu-Natal       | HM194138 |
| 21       | Hugh s.n., NSW                 | 42.10  | 108.62  | China              | North Central       | JN705411 |
| 21       | Baytopp 26, PRE                | -22.37 | 24.89   | Botswana           |                     | HM194134 |
| 21       | Ducloux s.n., UC               | 25.64  | 103.34  | China              | Yunnan              | JN705410 |
| 21       | Hiroe 17218, UC                | 36.48  | 138.70  | Japan              | Honshu              | JN705433 |
| 21       | Rechinger 14433, US            | 35.50  | 24.01   | Crete              | Chandia             | JN705436 |
| 21       | Surapat 44, US                 | 13.99  | 100.32  | Thailand           | Bangkok             | JN705417 |
| 21       | Kayombo <i>et al.</i> 4402, MO | -5.51  | 37.54   | Tanzania           | Kilwa               | JN705430 |
| 22       | Yupeng s.n.                    | 22.63  | 110.15  | China              | Guangxi             | HM194153 |
| 23       | Telford 9952, CANB             | -12.20 | 96.83   | Indian Ocean       | West Island         | HM194051 |
| 24       | Starr 990512-2, BISH           | 28.22  | -177.43 | Hawaii             | Midway Atoll        | HM194073 |
| 25       | Fraser 336, CANB               | -20.60 | 139.55  | Australia          | Qld                 | HM194046 |
| 25       | Julien s.n., CANB              | 43.01  | 9.41    | France             | Corsica             | HM194057 |
| 25       | Zohary & Amdursky 460, MPU     | 31.78  | 34.78   | Israel             | Tel Aviv            | HM194079 |
| 25       | Waterhouse BMW6582             | 7.50   | 134.57  | Palau              | Peleliu Is          | HM194131 |
| 25       | IPSE 75/394E, MPU              | 39.87  | -3.83   | Spain              | Valencia            | HM194139 |
| 26       | BRI734146                      | 7.32   | 134.48  | Palau              | Peleliu Is          | HM194044 |
| 26       | Furuse 3601, K                 | 36.10  | 140.53  | Japan              | Ishiggaki Prov.     | HM194084 |
| 26       | White s.n., CANB               | -20.73 | 139.48  | Australia          | Qld                 | HM194113 |
| 27       | Arboowy 241, MPU               | 12.27  | 108.08  | Vietnam            | Saigon              | HM194151 |
| 28       | Smith 704, K                   | -18.45 | 22.05   | Botswana           | Okavango river      | HM194080 |
| 28       | Wild & Gilbert 416, K          | 5.17   | 37.60   | Ethiopia           | Sidamo              | HM194082 |
| 28       | Ghani 1204, K                  | 29.72  | 30.30   | Egypt              | western desert      | HM194083 |
| 29       | BISH 728774                    | 20.80  | -156.30 | Hawaii             | Makawao             | HM194074 |
| 29       | Pence 16, FLAS                 | 28.71  | -80.73  | USA                | Florida             | HM194140 |
| 29       | Pence 26, FLAS                 | 25.45  | -80.20  | USA                | Florida             | HM194142 |
| 29       | Pence 105, FLAS                | 29.65  | -82.24  | USA                | Florida             | HM194145 |
| 29       | Pence 143, FLAS                | 29.63  | -82.37  | USA                | Florida             | HM194146 |
| 29       | Tracy 6472, US                 | 32.41  | -89.44  | USA                | Mississippi         | JN705391 |
| 29       | Fosberg 46296, NY              | 13.44  | 144.75  | Guam               |                     | JN705388 |
| 29       | Asplund 16587, NY              | -0.77  | -79.96  | Ecuador            | Manabi              | JN705390 |
| 29       | Adams 14657, NY                | 10.39  | -61.26  | Trinidad           | Scotland Bay        | JN705393 |
| 29       | Karl 39636, NY                 | 32.39  | -86.67  | USA                | Alabama             | JN705392 |
| 29       | Summers & Borsch 8432A, MO     | 27.63  | -81.15  | USA                | Florida             | JN705413 |
| 29       | Bradley & Stone 937, MO        | 27.63  | -81.15  | USA                | Florida             | JN705412 |
| 29       | Lewis 7129, MO                 | 24.66  | -78.06  | Bahamas            | Grand Bahama Island | JN705420 |
| 30       | Segura & Martinez 4486, XAL    | 19.75  | -70.40  | Dominican Republic | Cabarete            | HM193965 |
| 30       | Pence 2, FLAS                  | 28.15  | -81.23  | USA                | Florida             | HM194141 |
| 30       | Pence 7, FLAS                  | 28.15  | -81.23  | USA                | Florida             | HM194143 |
| 30       | Pence 10, FLAS                 | 30.76  | -83.32  | USA                | Florida             | HM194144 |
| 30       | Pence 15, FLAS                 | 30.18  | -85.66  | USA                | Florida             | HM194147 |
| 30       | Pence 27, FLAS                 | 30.18  | -85.66  | USA                | Florida             | HM194149 |
| 31       | Pence 21, FLAS                 | 30.57  | -86.92  | USA                | Florida             | HM194148 |
| 32       | Julien 2007, CANB              | 28.60  | -80.60  | USA                | Florida             | HM194070 |
| 33       | J. Fattefone s.n., MPU         | 33.22  | -7.07   | Morocco            |                     | HM194115 |
| 34       | Niger 909, MPU                 | 15.18  | 6.52    | Niger              | Maradi              | HM194117 |
| 35       | BRI 564613                     | -21.54 | 148.26  | Australia          | Qld                 | HM194036 |
| 35       | Sharpe 2114, CANB              | -26.58 | 153.08  | Australia          | Qld                 | HM194052 |
| 35       | Coveny 12454, CANB             | -30.00 | 153.22  | Australia          | NSW                 | HM194053 |
| 35       | Macdonald s.n. NE              | -30.03 | 153.20  | Australia          | NSW                 | HM194056 |
| 35       | Carter s.n., CANB              | -16.00 | 125.00  | Australia          | WA                  | HM194152 |
| 35       | Evans 243, NY                  | 13.44  | 144.75  | Guam               |                     | JN705419 |
| 36       | Craven 4394, CANB              | -13.50 | 130.48  | Australia          | NT                  | HM194054 |
| 37       | van Klinken s.n., CANB         | -12.53 | 131.30  | Australia          | NT                  | HM194025 |
| 37       | BRI 490033                     | -25.12 | 151.13  | Australia          | Qld                 | HM194029 |
| 37       | BRI 492328                     | -20.47 | 148.70  | Australia          | Qld                 | HM194030 |
| 37       | BRI 548957                     | -4.09  | 144.78  | PNG                | Madang              | HM194034 |
| 37       | BRI 560205                     | -12.50 | 132.50  | Australia          | NT                  | HM194035 |
| 37       | BRI 585377                     | -24.79 | 151.23  | Australia          | Qld                 | HM194038 |
| 37       | BRI 599126                     | -12.81 | 143.54  | Australia          | Qld                 | HM194039 |
| 37       | BRI 603545                     | -25.13 | 152.59  | Australia          | Qld                 | HM194040 |
| 37       | BRI 676053                     | -24.97 | 151.12  | Australia          | Qld                 | HM194041 |
| 37       | BRI 680060                     | -8.33  | 140.73  | Indonesia          | Irian Jaya          | HM194042 |

| Ribotype             | Voucher                         | Lat    | Long    | Provenance  | State           | GenBank  |
|----------------------|---------------------------------|--------|---------|-------------|-----------------|----------|
| 37                   | BRI 680062                      | −1.47  | 136.12  | Indonesia   | Irian Jaya      | HM194043 |
| 37                   | BRI 772166                      | −17.09 | 139.62  | Australia   | Qld             | HM194045 |
| 37                   | DNA 0132982                     | −12.88 | 130.58  | Australia   | NT              | HM194060 |
| 37                   | DNA 0177123                     | −8.00  | 125.00  | East Timor  | Los Palos       | HM194063 |
| 37                   | MEL287620                       | −25.00 | 151.00  | Australia   | Qld             | HM194107 |
| 37                   | MEL1611832                      | −12.00 | 133.00  | Australia   | NT              | HM194110 |
| 37                   | MEL1586921                      | −13.00 | 135.00  | Australia   | NT              | HM194111 |
| 37                   | Julien s.n., CANB               | −15.00 | 133.00  | Australia   | NT              | HM194116 |
| 37                   | van Klinken s.n., CANB          | −16.73 | 128.57  | Australia   | NT              | HM194118 |
| 37                   | Bean 7041, NSW                  | −25.17 | 152.5   | Australia   | Qld             | JN705422 |
| 38                   | BRI 480192                      | −16.53 | 122.86  | Australia   | WA              | HM194028 |
| 38                   | DNA 0145306                     | −15.63 | 130.47  | Australia   | NT              | HM194061 |
| 38                   | DNA 0049090                     | −14.92 | 133.07  | Australia   | NT              | HM194065 |
| 38                   | PERTH 04181913                  | −15.81 | 128.65  | Australia   | WA              | HM194127 |
| 38                   | PERTH 03151522                  | −17.83 | 122.74  | Australia   | WA              | HM194128 |
| 39                   | DNA 0061991                     | −11.93 | 130.97  | Australia   | NT              | HM194066 |
| 40                   | DNA 0125002                     | −12.38 | 132.13  | Australia   | NT              | HM194059 |
| 40                   | PERTH 05770068                  | −19.77 | 121.37  | Australia   | WA              | HM194124 |
| 41                   | DNA 0178568                     | −15.00 | 130.00  | Australia   | NT              | HM194064 |
| 41                   | DNA 0076240                     | −14.92 | 133.07  | Australia   | NT              | HM194067 |
| 42                   | BRI 507274                      | −19.29 | 147.04  | Australia   | Qld             | HM194031 |
| 42                   | BRI 518273                      | −11.68 | 136.84  | Australia   | NT              | HM194032 |
| 42                   | DNA 0172436                     | −11.36 | 132.31  | Australia   | NT              | HM194062 |
| 42                   | DNA 0076375                     | −11.30 | 131.83  | Australia   | NT              | HM194068 |
| 42                   | DNA 0076710                     | −12.18 | 136.77  | Australia   | NT              | HM194069 |
| 42                   | MEL 1617640                     | −11.00 | 132.00  | Australia   | NT              | HM194108 |
| 42                   | MEL 713745                      | −11.00 | 133.00  | Australia   | NT              | HM194109 |
| 42                   | MEL 1582951                     | −15.00 | 133.00  | Australia   | NT              | HM194112 |
| 43                   | PERTH 01411373                  | −21.59 | 117.07  | Australia   | WA              | HM194130 |
| 44                   | DNA 0123102                     | −11.17 | 132.52  | Australia   | NT              | HM194058 |
| 45                   | BRI 344747                      | −12.31 | 143.08  | Australia   | Qld             | HM194026 |
| 46                   | BRI 565769                      | −18.60 | 144.66  | Australia   | Qld             | HM194037 |
| 47                   | BRI 436599                      | −23.79 | 151.34  | Australia   | Qld             | HM194027 |
| 48                   | PERTH 06840582                  | −16.48 | 128.54  | Australia   | WA              | HM194119 |
| 49                   | PERTH 07158777                  | −19.12 | 121.52  | Australia   | WA              | HM194121 |
| 50                   | CANB 398284                     | −13.17 | 130.03  | Australia   | NT              | HM194048 |
| 51                   | CANB 13152                      | −20.30 | 118.58  | Australia   | WA              | HM194049 |
| 52                   | CANB 582359                     | −14.88 | 141.60  | Australia   | Qld             | HM194047 |
| 52                   | Whaite 3958, NSW                | −16.5  | 136.33  | Australia   | NT              | JN705437 |
| 53                   | CANB 440608                     | −14.95 | 132.15  | Australia   | NT              | HM194050 |
| 54                   | Rinehart LR24500                | 15.50  | 144.83  | Guam        | Yigo            | HM194132 |
| 55                   | Reinhart LR27793                | 13.50  | 144.83  | Guam        | Northwest Field | HM194133 |
| 56                   | Stanford 747, NY                | 24.29  | −98.72  | Mexico      | Tamaulipas      | JN705418 |
| 57                   | Nelson s.n., NE                 | −32.13 | 150.85  | Australia   | NSW             | HM193957 |
| 57                   | Thomas <i>et al.</i> 71632, NSW | 32.32  | −93.71  | USA         | Louisiana       | JQ014151 |
| 57                   | Bush 471, US                    | 36.49  | −90.07  | USA         | Missouri        | JQ014152 |
| 57                   | Demaree 1327, US                | 35.38  | −97.34  | USA         | Oklahoma        | JQ014153 |
| 57                   | Palmer 151, US                  | 16.73  | −93.18  | Mexico      | Chiapas         | JQ014154 |
| 57                   | Crutchfield 3614, NY            | 35.01  | −97.05  | USA         | Oklahoma        | JQ014155 |
| 57                   | Lehto L22827, NY                | 28.65  | −106.00 | Mexico      | Chihuahua       | JQ014156 |
| 57                   | Higgins 7664, NY                | 34.43  | −100.22 | USA         | Texas           | JQ014157 |
| 58                   | How 70924, UC                   | 20.04  | 110.38  | China       | Hainan          | JN705428 |
| 59                   | Welsh 23215, NY                 | 39.37  | −110.86 | USA         | Utah            | JN705435 |
| 60                   | Wooton s.n., US                 | 34.81  | −105.12 | USA         | New Mexico      | JN705425 |
| 61                   | Hiroe 13285, UC                 | 36.03  | 138.38  | Japan       | Honshu          | JN705433 |
| 62                   | Robinson 1334, NY               | 11.95  | 108.44  | Vietnam     | Annam           | JN705426 |
| 62                   | Rothschild 436, MO              | 19.52  | −104.95 | Mexico      | Chamela Bay     | JN705416 |
| 63                   | Richardson 107, US              | 7.42   | 134.53  | Palau       | Caroline Island | JN705423 |
| 64                   | Robbins s.n., UC                | 11.2   | −84.44  | Nicaragua   | Boaco           | JN705400 |
| 64                   | Ream 557, UC                    | 25.16  | 121.67  | Taiwan      | Northern Tip    | JN705399 |
| 64                   | Ward 7819, NY                   | 19.17  | −96.13  | Mexico      | Vercruz         | JN705403 |
| 64                   | King 1699, NY                   | 17.06  | −96.72  | Mexico      | Oaxaca          | JN705402 |
| 64                   | Breedlove 27300, NY             | 16.15  | −92.9   | Mexico      | Chiapas         | JN705401 |
| 64                   | Sidwell <i>et al.</i> 560, MO   | 13.68  | −89.05  | El Salvador | Lake Illopango  | JN705424 |
| <i>P.canescens</i> A | Julien & Sosa 332, CANB         | −35.46 | −72.48  | Chile       | Maule           | HM193960 |

**Table S2.** The 101 variable sites of the aligned sequences of the ITS1, 5.8S and ITS2 regions yielding 64 ribotypes in *Phyla nodiflora*. A dot (.) indicates that the character states are the same as for ribotype 1 and a dash (-) indicates an insertion in the aligned sequences.

**Data S1.** The mostly univariate sites of the aligned sequences of Petb and trnL-F in *Phyla nodiflora*. A dot (.) indicates that the character states are the same as for ribotype 1, N stands for any base and a dash (-) indicates an insertion in the aligned sequences.

**To be linked to an excel file called *Appendix I Data S1 chloroplastdata.xlsx***

**Data S2.** Estimates of evolutionary divergence between ribotypes (ribotype number is the first column and row). The number of base substitutions per site between sequences is shown. Standard error estimates are shown above the diagonal. Analyses were conducted using the Maximum Composite Likelihood model (Tamura *et al.*, 2004 [33]) implemented in MEGA5 (Tamura *et al.*, 2011 [27]). The analysis involved 64 DNA sequences and a total of 630 positions in the final dataset. 0= ribotypes are identical and 1=ribotypes differ in all positions.

**To be linked to an excel file called *Appendix I Data S2 Divergence matrix.xlsx***



**Figure S1a.** Floral and leaf characters for *Phyla nodiflora* (ribotype 35, GenBank HM194056) from Corindi Beach NSW, Australia (30.0155° S, 153.1855° E) and *Phyla canescens* from Bendigo, Victoria, Australia (36.7570° S, 144.2794° E). Images taken by M. Fatemi 2006.

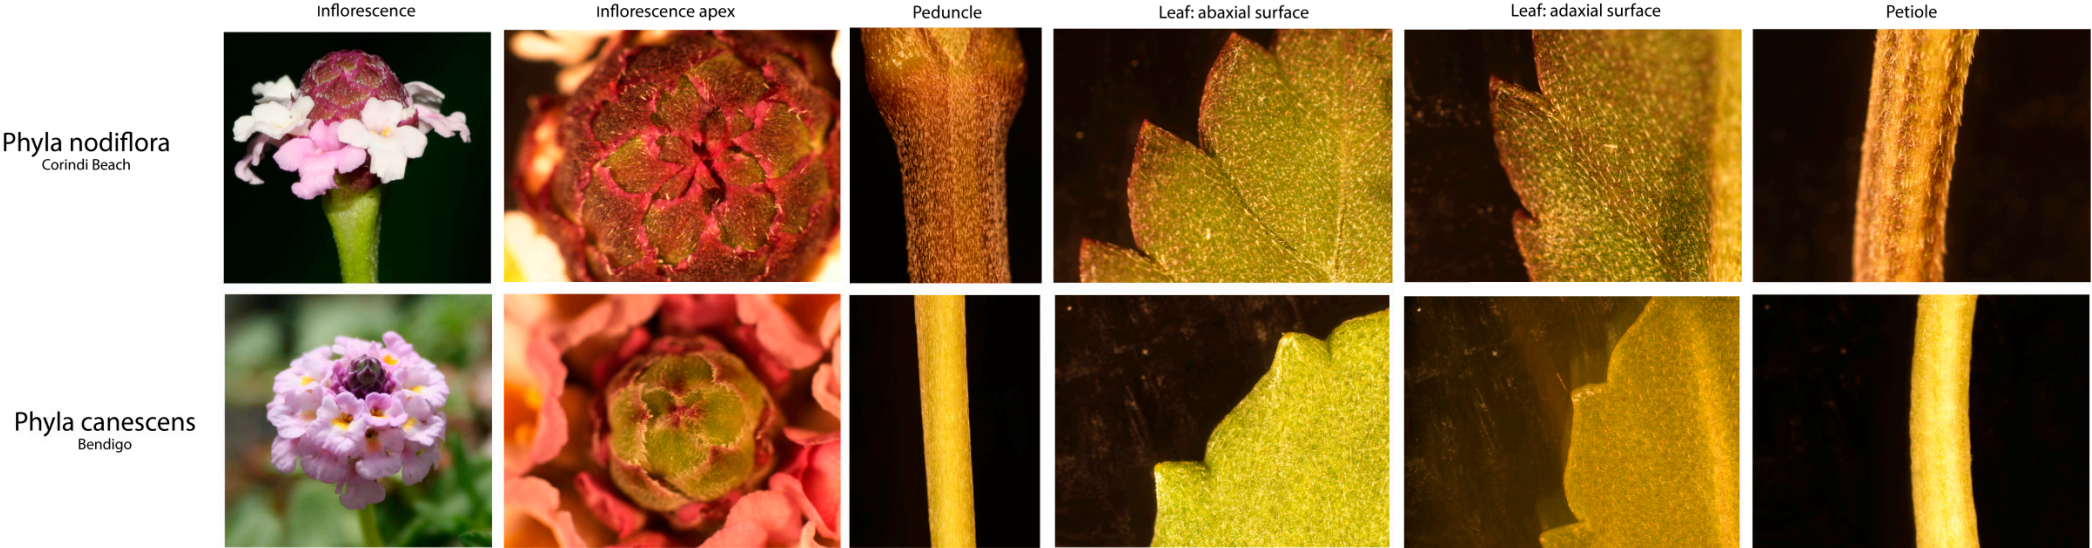

**Figure S1b.** Habit and spent flower heads of *Phyla nodiflora* (ribotype 26, GenBank HM194113) from Mt Isa, Qld (20.7256° S, 139.4927° E) and *Phyla canescens* from Kialami, New South Wales, Australia (30.4503°S, 151.5325°E). Images taken by A. White (CSIRO) 2007 (lower left) and C.L. Gross 2008 (lower right).

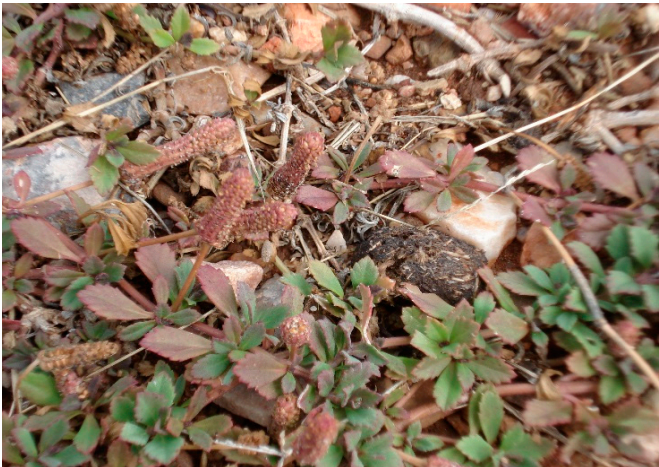

*Phyla nodiflora*

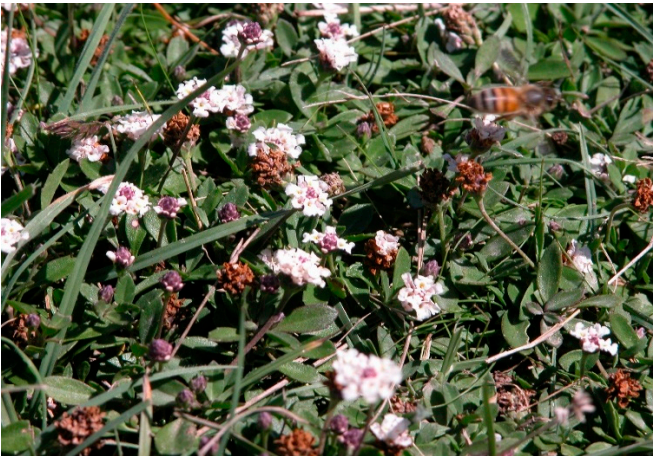

*Phyla canescens*
